# Supplementary material
Source: Springer Nature journal article supplement (https://www.springermedizin.de/resource/supplementary/12943_2010_904_MOESM8_ESM.pdf/9551960)
Supplement: MOESM8 [file 9551960]

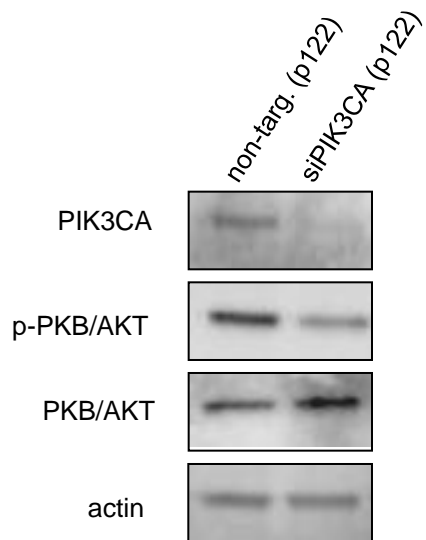

A

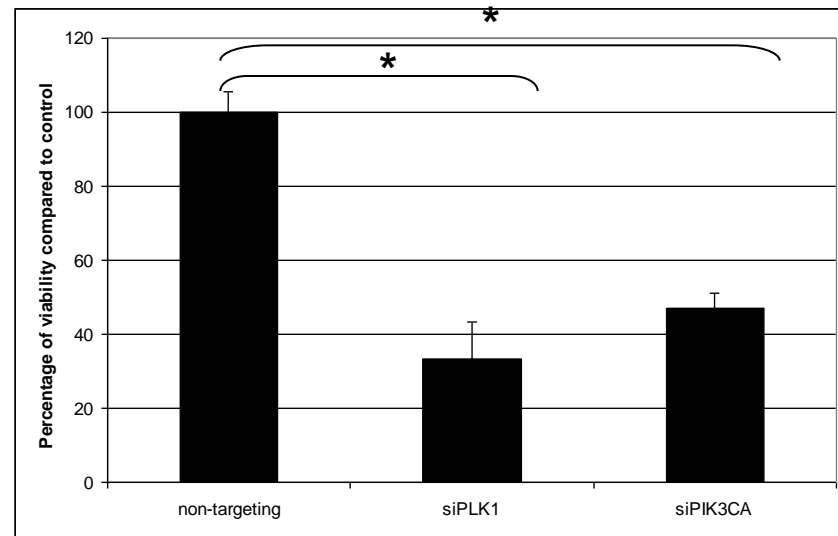

Anchorage independent cells (p119)

B

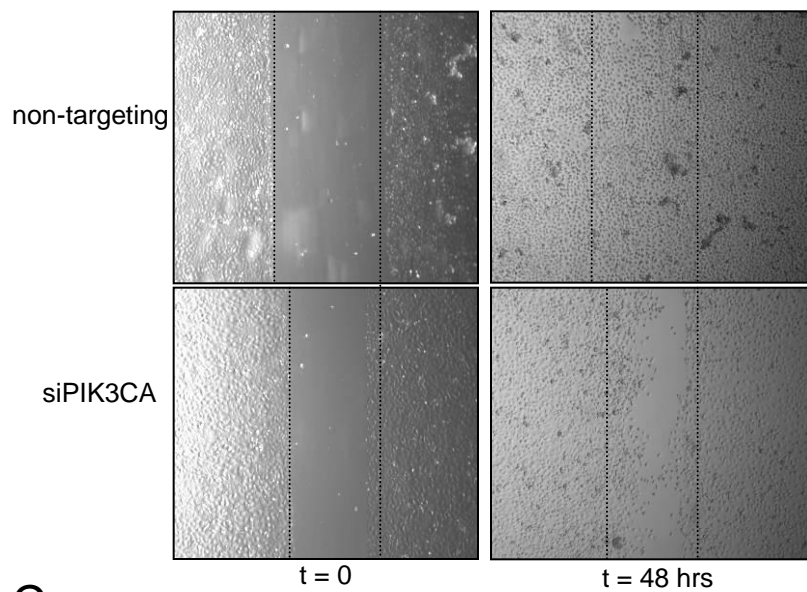

C

Anchorage independent cells (p125)

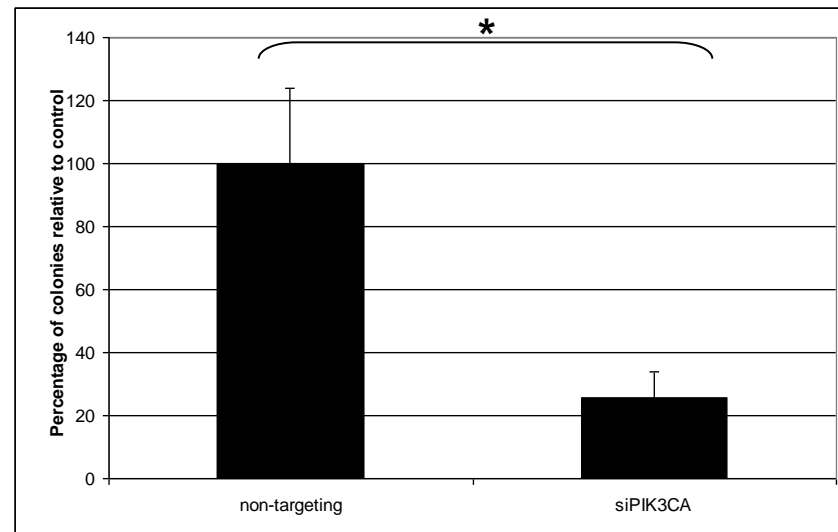

Anchorage independent cells (p119)

D
